# Supplementary material for: A Multifunctional Mutagenesis System for Analysis of Gene Function in Zebrafish
Source: PubMed Central journal article supplement (PMC4478556; doi:10.1534/g3.114.015842), 2015-04-02
Supplement: supp_g3.114.015842_FigureS1.pdf [file supp_g3.114.015842_FigureS1.pdf]

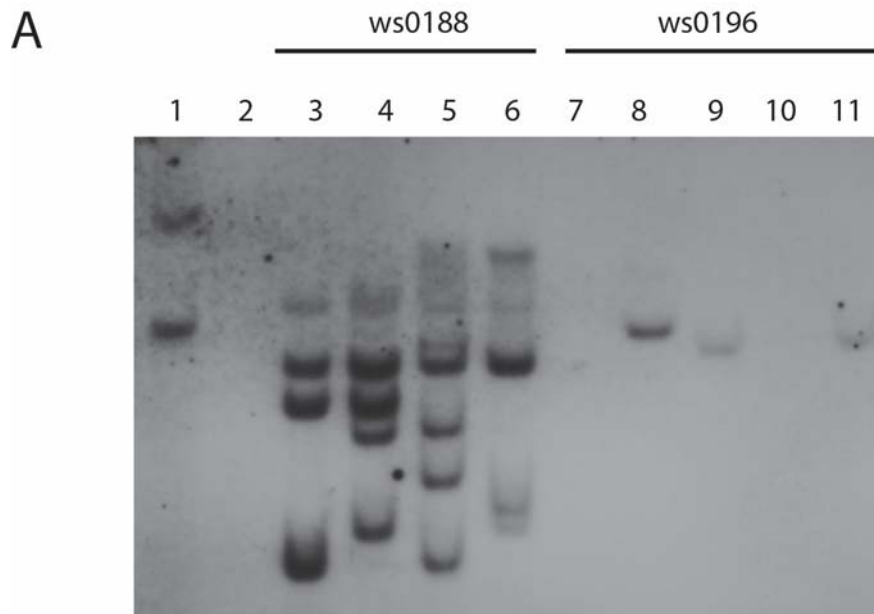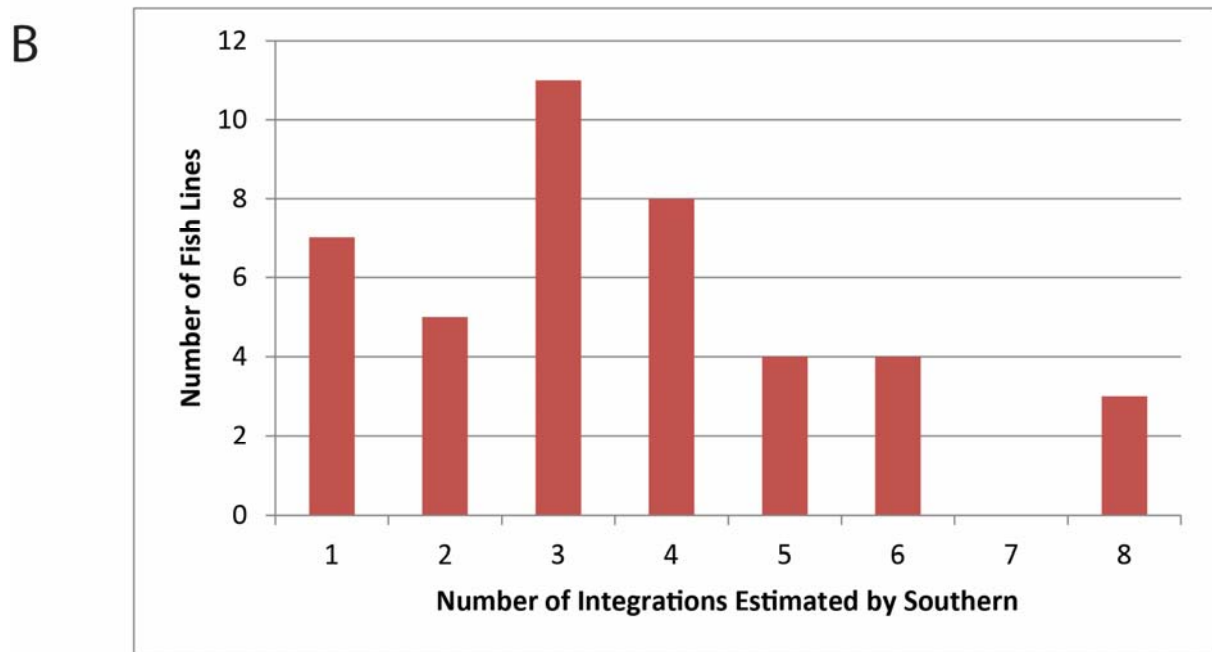

**Figure S1** Number of inserts per line. Southern analysis was performed on 42 representative trapped lines to estimate the number of inserts per line. A) Representative Southern blot analysis. Lane 1: Positive control containing vector DNA and AB genomic DNA. Lane 2: Negative control containing AB genomic DNA. Lanes 3-11: Outcrosses lines *Tg(DsDELGT4)ws0188* and *Tg(DsDELGT4)ws0196* showing multiple integrations per line. B) Estimated number of inserts per line.
