# Supplementary material for: A Multifunctional Mutagenesis System for Analysis of Gene Function in Zebrafish
Source: PubMed Central journal article supplement (PMC4478556; doi:10.1534/g3.114.015842), 2015-04-02
Supplement: supp_g3.114.015842_FigureS2.pdf [file supp_g3.114.015842_FigureS2.pdf]

## GFP Enhancer Trap

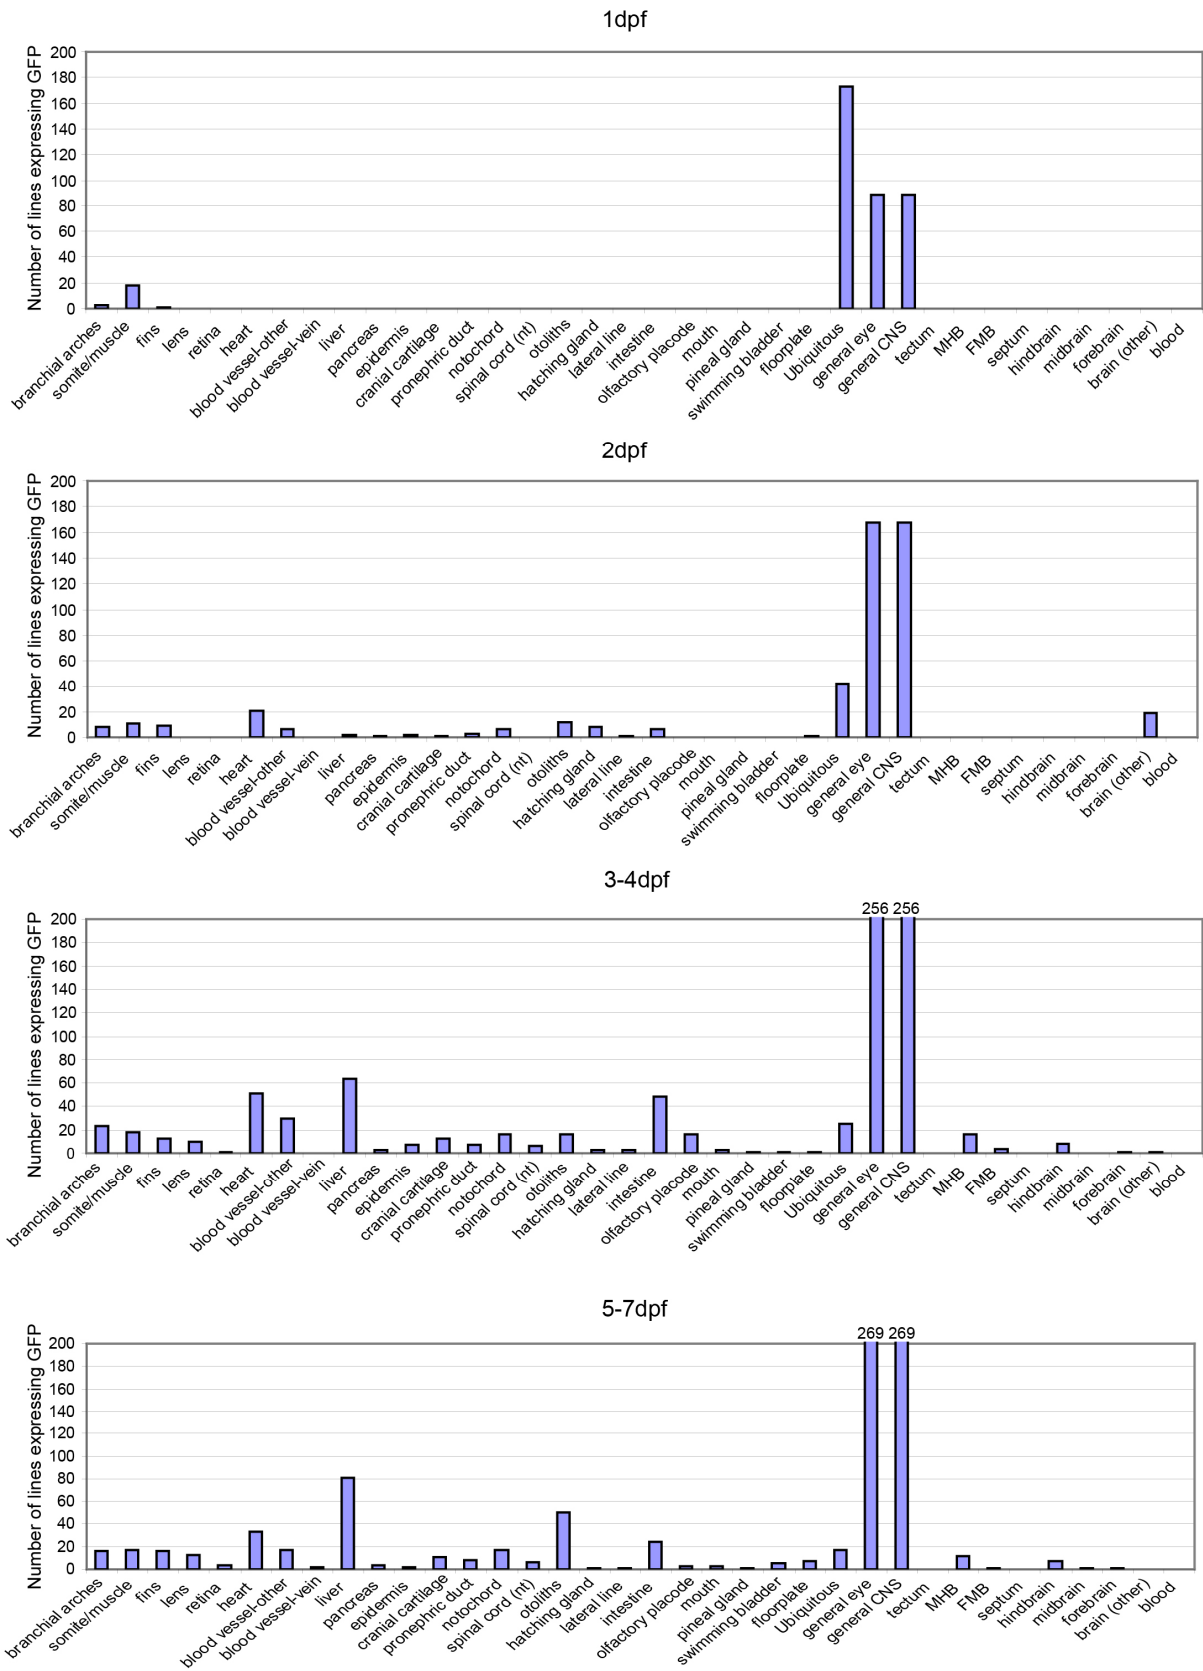

**Figure S2** The spatial-temporal distribution of enhancer trap reporter expression. Graphs show the number of lines expressing GFP in various tissues at 1 dpf, 2 dpf, 3-4 dpf and 5-7 dpf. CNS: central nervous system, MHB: mid-hindbrain boundary, FMB: forebrain-midbrain boundary.
